# Supplementary material for: Implications of exosomes derived from cholesterol-accumulated astrocytes in Alzheimer's disease pathology
Source: Oxford University Press journal article supplement (doi:10.1242/dmm.048929), 2021-09-15
Supplement: dmm048929supp.pdf [file dmm048929supp.pdf]

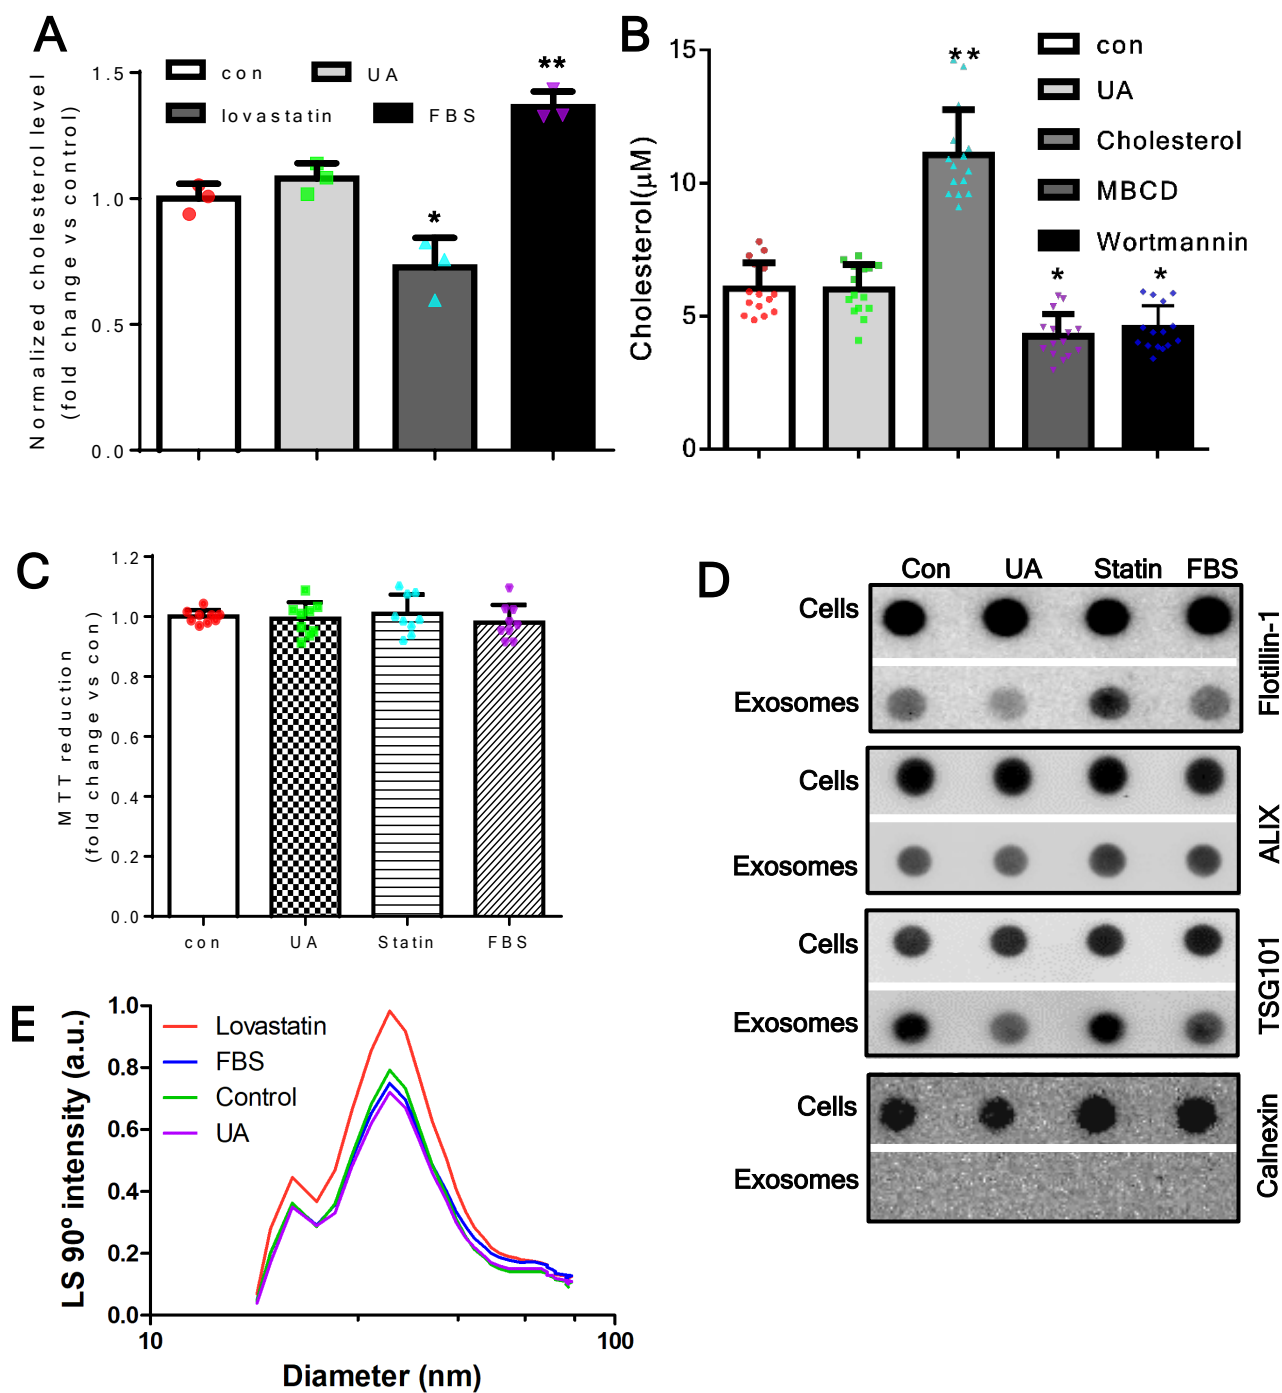

**Fig. S1. Effects Lavostatin and 10%FBS on exosome secretion from astrocytes.** **A;** Histogram showing the cellular cholesterol levels following treatment 5µg/mL U18666A, 5µM lavostatin and 10% FBS for 24hrs compared to control astrocytes as measured by gas chromatography. Note that cholesterol level was not altered in U18666A-treated cultured astrocytes but increased following exposure to 10% FBS and decreased after treatment with lavostatin. **B;** Histogram showing the cellular cholesterol levels following treatment 5µg/mL U18666A, 0.5µg/mL Cholesterol, 5µM MBCD or 5µM Wortmannin for 24hrs compared to control astrocytes. Note that cholesterol level was not altered in U18666A-treated cultured astrocytes but increased following exposure to extracellular cholesterol and decreased after treatment with MBCD and Wortmannin. **C;** Histogram showing the viability of cultured astrocytes was not altered following exposure to 5µg/mL U18666A, 5µM lavostatin and 10% FBS for 24hrs as revealed by MTT assay. **D;** Dot-blots showing the labelling of cell lysates and exosomes with Flotillin-1, ALIX and TSG101 following treatment 5µg/mL U18666A, 5µM lavostatin and 10% FBS for 24hrs compared to control astrocytes. **E;** Dynamic light scattering showing the relative size and number of secreted exosomes following treatment U18666A, lavostatin and 10% FBS compared to control astrocytes. Note that number of exosomes secreted decreased from U18666A- and 10% FBS-treated astrocytes but increased from lavostatin-treated astrocytes compared to control astrocytes. All results are presented as means  $\pm$  SEM and obtained from three separate experiments. \* $p < 0.05$ , \*\* $p < 0.01$  and \*\*\* $p < 0.001$ . Con, control; UA, U18666A.

## Supplementary Figure 2

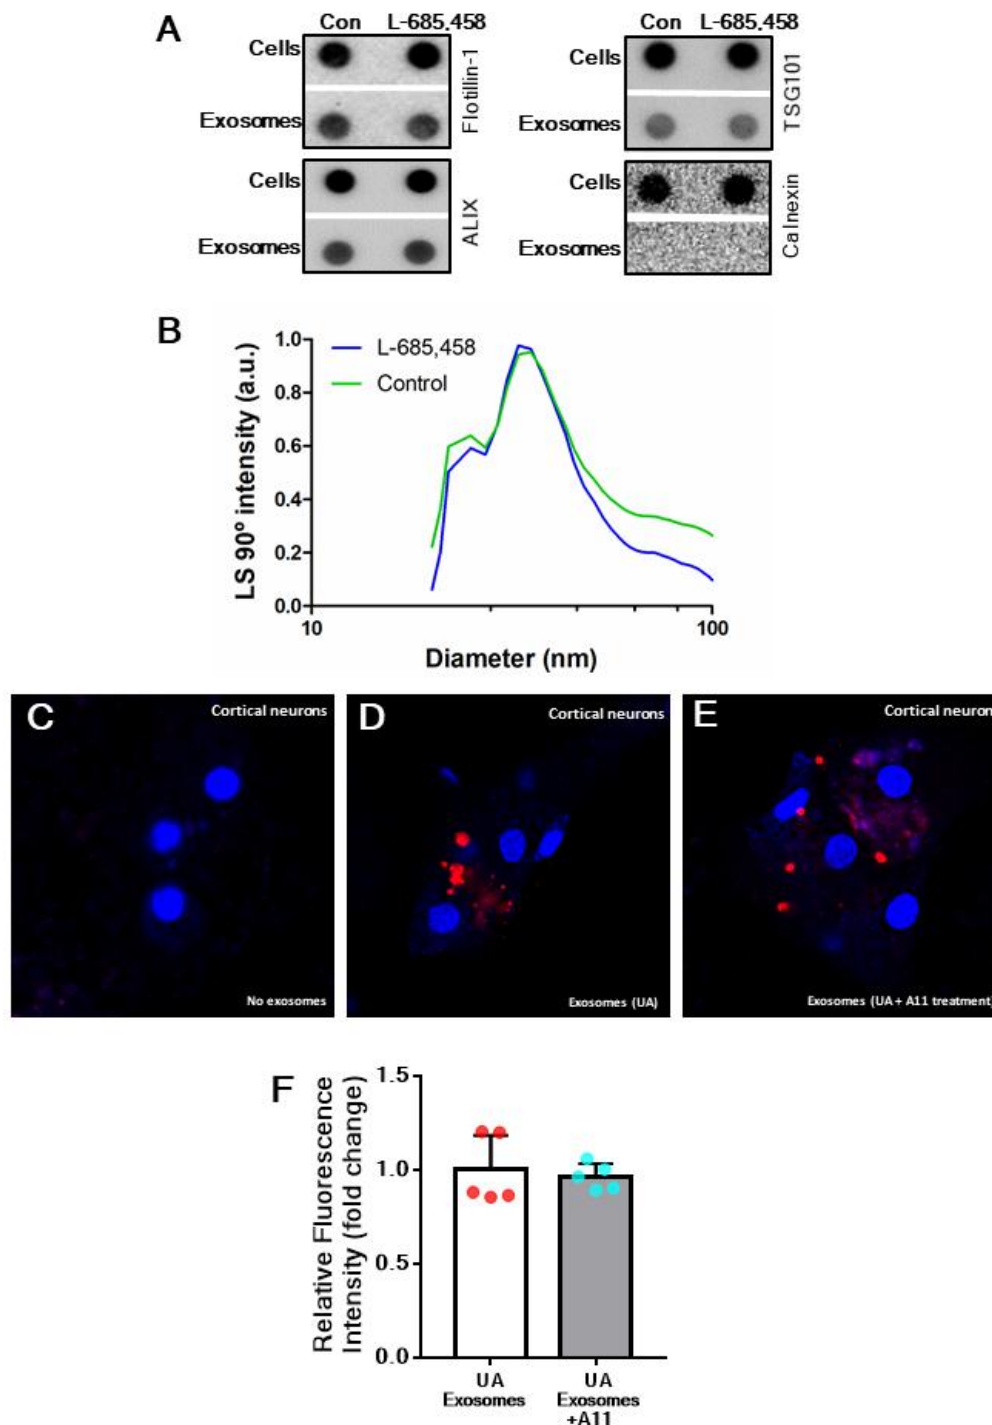

**Fig. S2. Characterization of exosomes secreted following treatment with  $\gamma$ -secretase inhibitor and the neuronal uptake of exosomes after exposure to A11 antibody.**

**A;** Dot-blots showing the labelling of cell lysates and secreted exosomes derived from  $\gamma$ -secretase inhibitor-treated cultured astrocytes in the presence or absence of U18666A with Flotillin-1, ALIX and TSG101. **B;** Dynamic light scattering showing the relative size

of secreted exosomes derived from  $\gamma$ -secretase inhibitor-treated astrocytes in the presence or absence of U18666A. **C-E**; Photomicrographs of primary cortical neurons without exposure to exosomes (C) and following cellular uptake of exosomes from Dil-labelled U18666A (D) and U18666A + A11-treated (E) cultured astrocytes. **F**; Histograms showing quantification of relative fluorescence intensity representing no alteration in the uptake of Dil-labelled exosomes by primary cortical neurons in the presence of A11 antibody.

**Table S1. Details of the primary antibodies used in this study**

| Antibody type              | Type       | WB/DB dilution | Source                   |
|----------------------------|------------|----------------|--------------------------|
| A11                        | Polyclonal | 1:1000         | Thermo Fisher Scientific |
| A $\beta$ oligomers        | Polyclonal | 1:1000         | Abcam Inc.               |
| ADAM10                     | Polyclonal | 1:2000         | EMD Millipore Co.        |
| APP (clone Y188)           | Monoclonal | 1:5000         | Abcam Inc.               |
| APP-KPI                    | Polyclonal | 1:1000         | EMD Millipore Co.        |
| BACE1                      | Polyclonal | 1:2000         | Abcam Inc.               |
| CD63                       | Monoclonal | 1:1000         | Abcam Inc.               |
| CD81                       | Monoclonal | 1:1000         | Abcam Inc.               |
| Presenilin1                | Polyclonal | 1:2000         | EMD Millipore Co.        |
| Nicastrin                  | Polyclonal | 1:800          | Santa Cruz Biotechnology |
| Soluble APP $\alpha$ (2B3) | Monoclonal | 1:100          | IBL Co., Ltd             |
| Soluble APP $\beta$ (WT)   | Monoclonal | 1:100          | IBL Co., Ltd             |
| LAMP1                      | Polyclonal | 1:1000         | Abcam Inc.               |
| LC3                        | Polyclonal | 1:1000         | MBL International Co.    |
| $\beta$ -actin             | Monoclonal | 1:5000         | Sigma-Aldrich, Inc.      |
| ALIX                       | Monoclonal | 1:500          | Santa Cruz Biotechnology |
| Flotillin-1                | Polyclonal | 1:1000         | Thermo Fisher Scientific |
| TSG101                     | Monoclonal | 1:1000         | Abcam Inc.               |
| Calnexin                   | Monoclonal | 1:500          | Santa Cruz Biotechnology |

WB: Western blot; DB: dot-blot.
